# Supplementary material for: Modelling of Drinking Water Recarbonization in Fluidized Bed Reactor
Source: Preprints.org preprint supplement (doi:10.20944/preprints202310.0994.v1), 2023-10-17
Supplement: Supplementary file 1 [file supplementary]

**Supplementary materials**

**S: Figures**


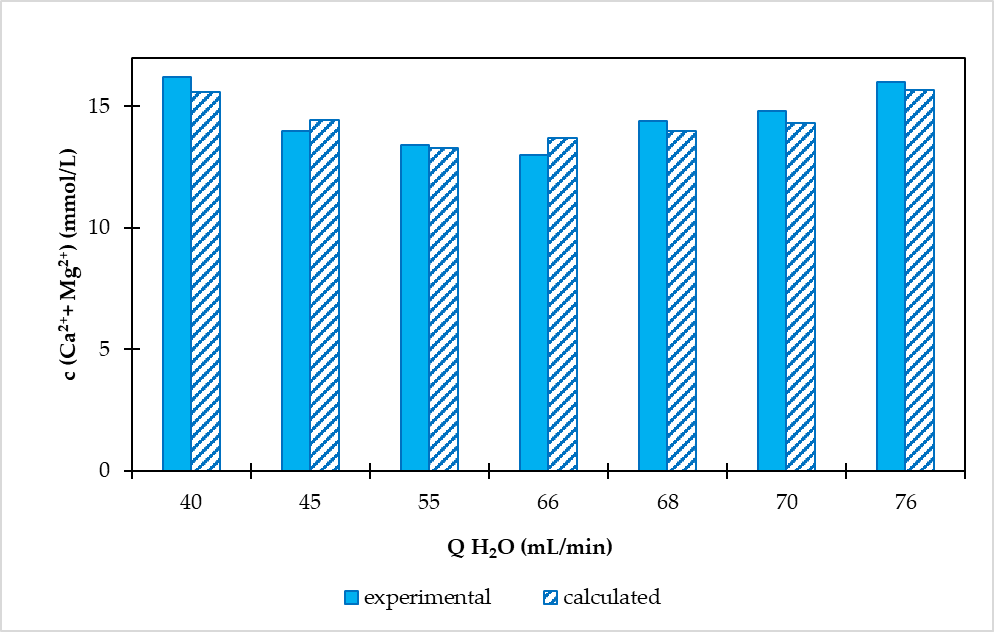


Figure S1. Calculated and measured concentrations of Ca2++Mg2+ at different flows of treated water and CO2 flow at the level of 0.5 L/min during operation of the laboratory FBRR


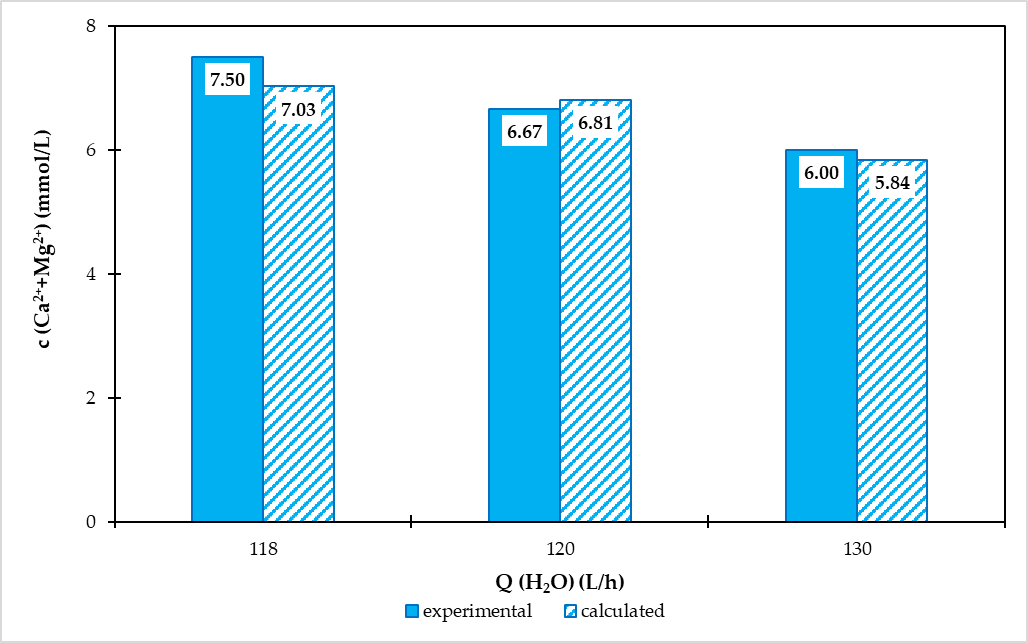


Figure S2 The total concentration of the sum of Ca2+ and Mg2+ ions in drinking water at Q(CO2) = 0.5 L/min


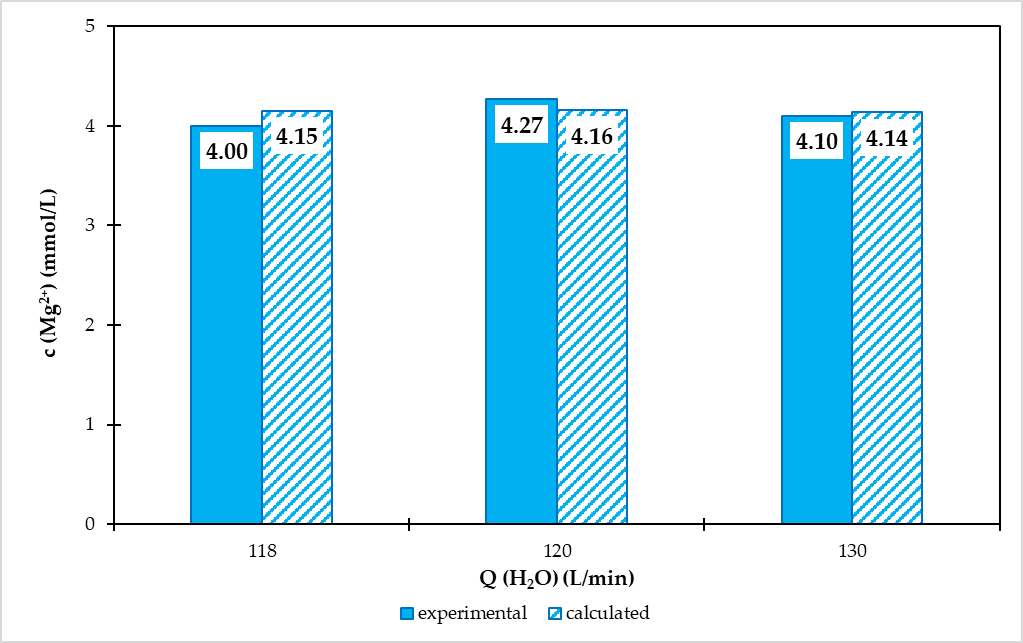


Figure S3. Molar concentration of Mg2+ in drinking water at Q(CO2) = 0.5 L/min


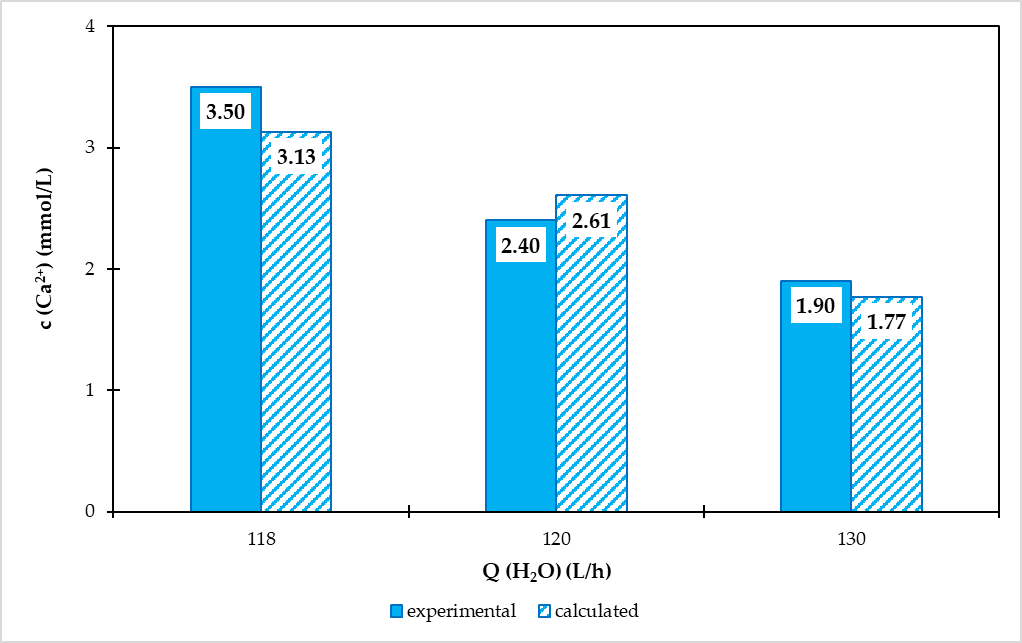


Figure S4. Molar concentration of Ca2+ in drinking water at Q(CO2) = 0.5 L/min


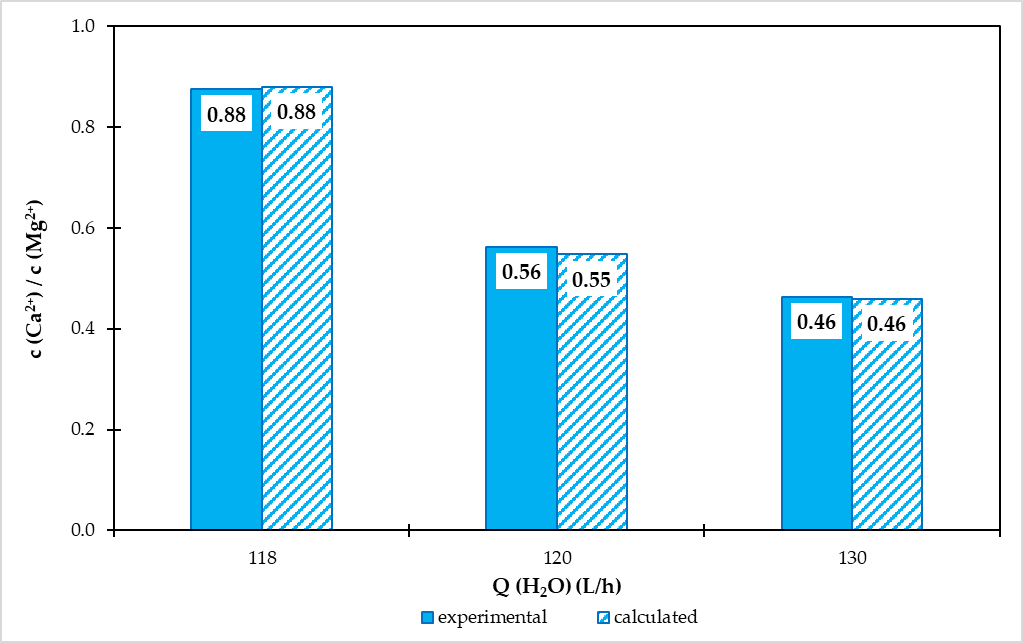


Figure S5. Molar concentration ration of Ca2+ and Mg2+ in drinking water at Q(CO2) = 0.5 L/min


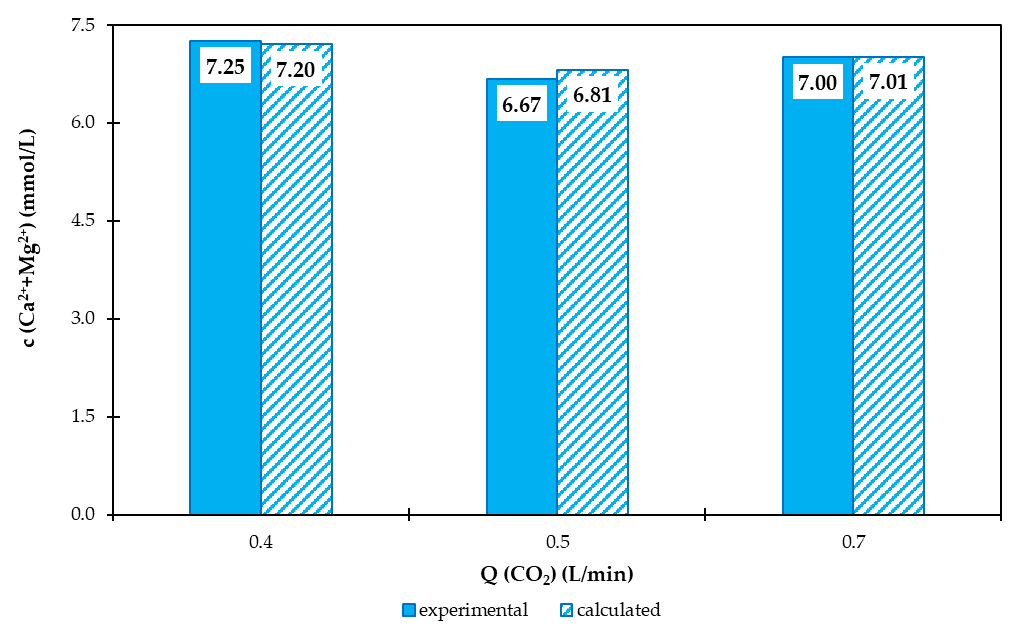


Figure S6. Molar concentration of the sum of Ca2+ and Mg2+ in drinking water at Q(H2O) = 120 L/h


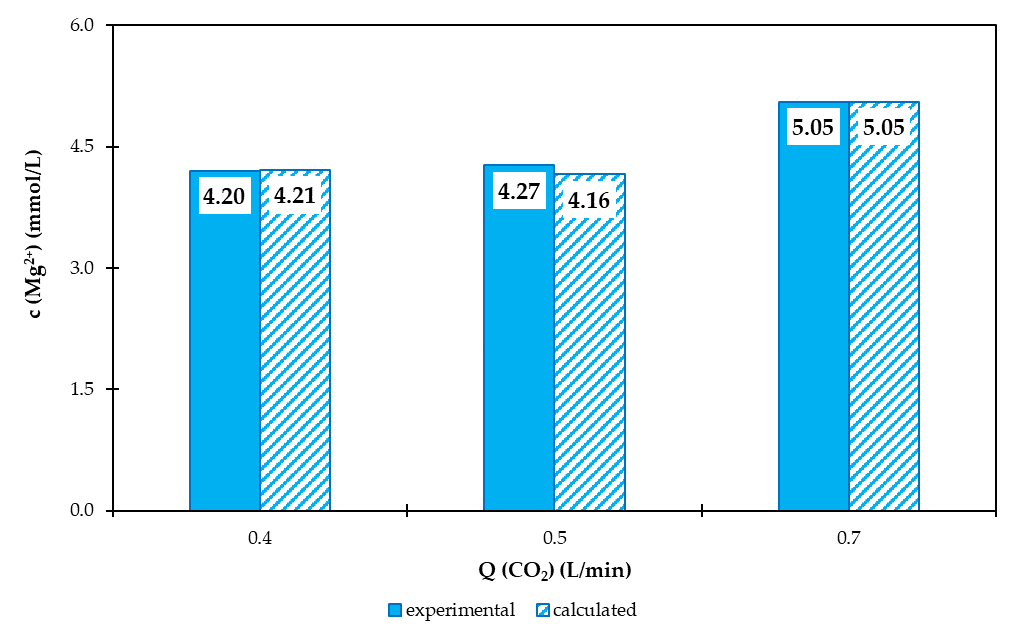


Figure S7. Molar concentration of the sum of Mg2+ in drinking water at Q(H2O) = 120 L/h


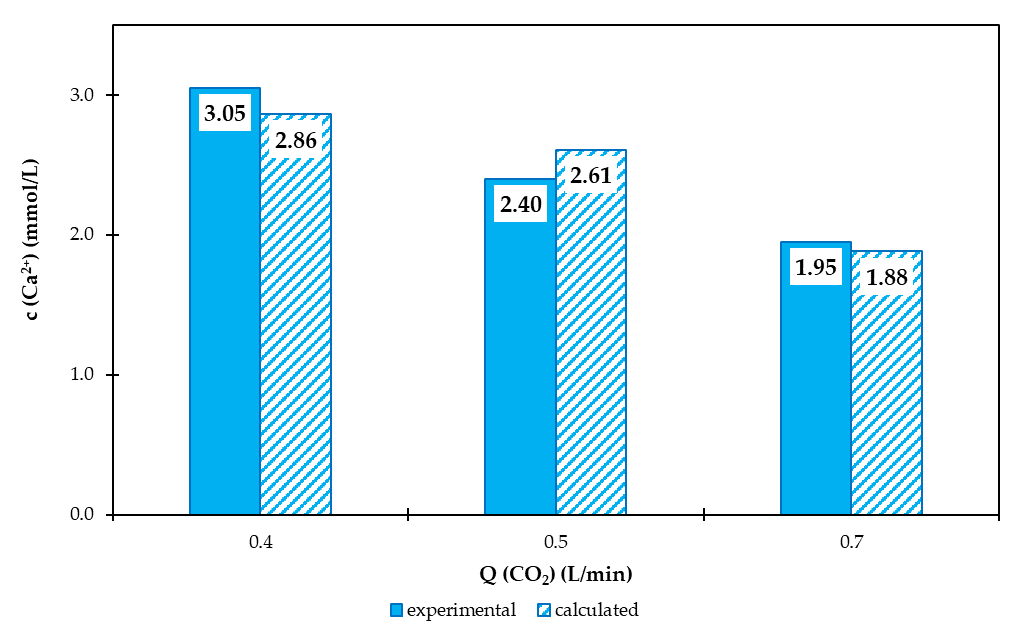


Figure S8. Molar concentration of the sum of Ca2+ in drinking water at Q(H2O) = 120 L/h


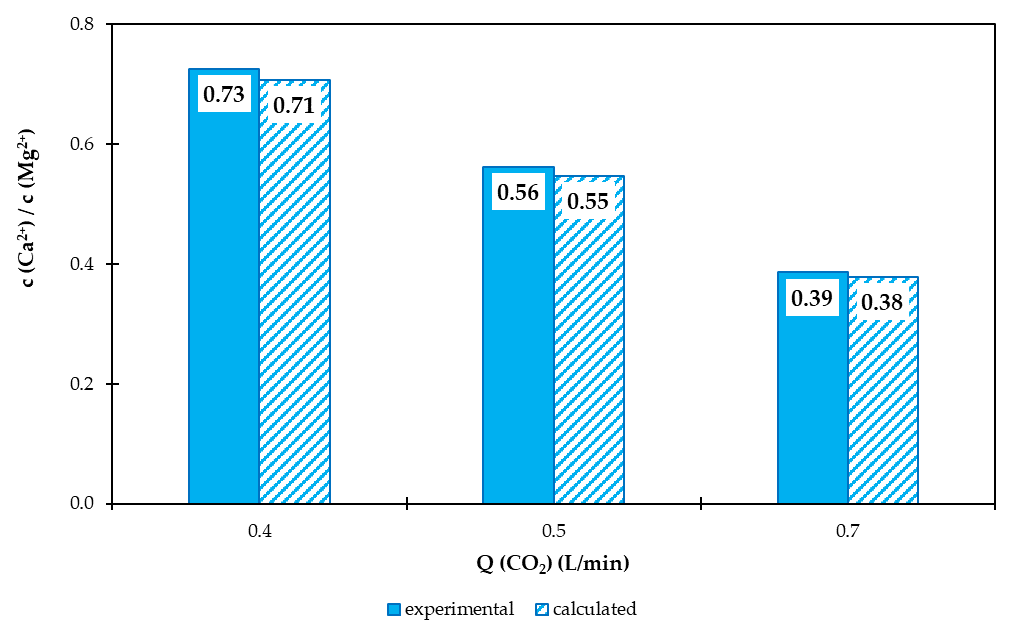


Figure S9. Molar ratio of Ca2+ and Mg2+ concentration in drinking water at Q(H2O) = 120 L/h
